# Supplementary material
Source: HighWire-hosted journal article supplement (https://bmjopen.bmj.com/content/12/7/e064508)
Supplement: inline-supplementary-material-1 [file inline-supplementary-material-1.pdf]

### Items of the Quality of Dying and Death-Revised Global Version (QODD-RGV)

Rating scales: Items 1–25 are rated from 1 (“not at all”) to 5 (“extremely”). Item 26 is rated from 1 (“terrible”) to 10 (“almost perfect”). Options to indicate “don’t know” or “no response” are also included in both rating scales.

During the last seven days of X’s life, to what extent did/was X...

1. Suffer from pain?
  2. Experience difficulties with eating or drinking?
  3. Have discomfort associated with bladder or bowels?
  4. Have difficulties with breathing?
  5. At peace with dying?
  6. Afraid of dying?
  7. Sad or distressed?
  8. Worried about burden on loved ones?
  9. Suffer from fatigue?
  10. Keep their dignity and self-respect?
  11. Feel supported by family?
  12. Feel supported by friends and community?
  13. Feel lonely?
  14. Feel supported by healthcare providers?
  15. Feel abandoned by those close to them?
  16. Feel satisfied with the life that they lived?
  17. Feel loved by those important to them?
  18. Worry about financial matters?
  19. Take comfort in religion, faith or personal beliefs?
  20. Feel let down by religion, faith or personal beliefs?
  21. Feel at peace with the relationships in their life?
  22. Receive the care at the end of life that they wanted?
  23. Satisfied with the location of death?
  24. Have the people they wanted with them at the end of life?
  25. Comfortable in the last moments just before death?
26. How would you rate X’s overall experience of dying and death in the last seven days of life?
